# Supplementary material for: Mapping mycological ignorance – checklists and diversity patterns of fungi known for West Africa
Source: PubMed Central journal article supplement (PMC7341642; doi:10.1186/s43008-020-00034-y), 2020-07-07

**R = 0.12, P = 0.14**

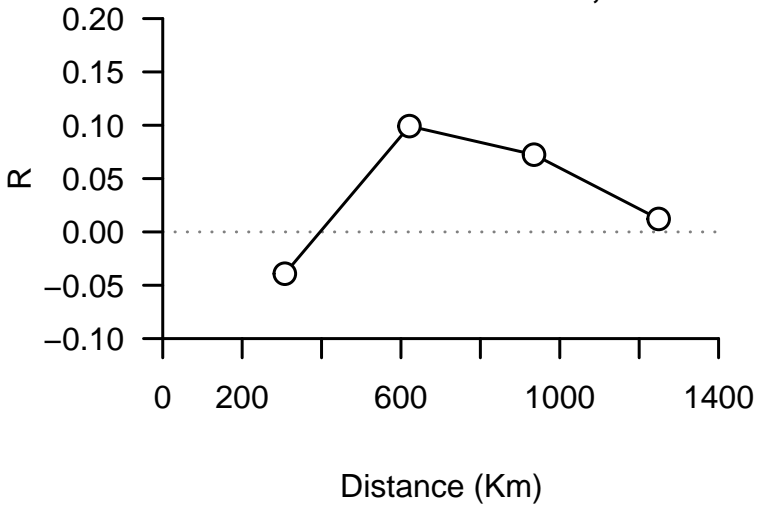

Supplement: 43008_2020_34_MOESM16_ESM.pdf [file 43008_2020_34_MOESM16_ESM.pdf]
